# 1 **Microscale tracking of coral disease reveals timeline of infection** 2 **and heterogeneity of polyp fate.**

3 Assaf R. Gavish<sup>1</sup>, Orr H. Shapiro<sup>1,2,\*</sup>, Esti Kramarsky-Winter<sup>1</sup> and Assaf Vardi<sup>1\*</sup>

4 <sup>1</sup>Department of Plant and Environmental Sciences, Weizmann Institute of Science,  
5 Rehovot, Israel.

6 <sup>2</sup>Department of Food Quality and Safety, Agricultural Research Organization, Volcani  
7 Center, Rishon LeZion, Israel.

8 \* –Corresponding authors: [orr@agri.gov.il](mailto:orr@agri.gov.il), [assaf.vardi@weizmann.ac.il](mailto:assaf.vardi@weizmann.ac.il)

## 9 **Abstract**

10 Coral disease is often studied at scales ranging from single colonies to the entire  
11 reef. This is particularly true for studies following disease progression through time.  
12 To gain a mechanistic understanding of key steps underlying infection dynamics, it  
13 is necessary to study disease progression, and host-pathogen interactions, at  
14 relevant microbial scales. Here we provide a dynamic view of the interaction  
15 between the model coral pathogen *Vibrio coralliilyticus* and its coral host *Pocillopora*  
16 *damicornis* at unprecedented spatial and temporal scales. This view is achieved  
17 using a novel microfluidics-based system specifically designed to allow microscopic  
18 study of coral infection *in-vivo* under controlled environmental conditions. Analysis  
19 of exudates continuously collected at the system's outflow, allows a detailed  
20 biochemical and microbial analyses coupled to the microscopic observations of the  
21 disease progression. The resulting multilayered dataset provides the most detailed  
22 description of a coral infection to-date, revealing distinct pathogenic processes as  
23 well as the defensive behavior of the coral host. We provide evidence that infection  
24 in this system occurs following ingestion of the pathogen, and may then progress  
25 through the gastrovascular system. We further show infection may spread when  
26 pathogens colonize lesions in the host tissue. Copious spewing of pathogen-laden  
27 mucus from the polyp mouths results in effective expulsion of the pathogen from the  
28 gastrovascular system, possibly serving as a first line of defense. A secondary  
29 defense mechanism entails the severing of calicoblastic connective tissues resulting  
30 in the controlled isolation of diseased polyps, or the survival of individual polyps  
31 within infected colonies. Further investigations of coral-pathogen interactions at  
32 these scales will help to elucidate the complex interactions underlying coral disease,  
33 as well as the versatile adaptive response of the coral ecosystems to fluctuating  
34 environments.

## 35 **Introduction**

36 Coral reefs are currently undergoing an unprecedented decline driven by local and  
37 global changes to their environment<sup>1</sup>. Reef building corals, commonly described as  
38 holobionts, form a complex relationship with photosynthesizing dinoflagellates  
39 (*Symbiodinium spp.*) and a consortium of microbial partners<sup>2</sup>. Shifts in  
40 environmental conditions may lead to the breakdown of these symbiotic relations,  
41 often with catastrophic consequences for the coral colony. Such processes,  
42 collectively termed coral disease<sup>3, 4</sup>, may be manifested as a loss of the algal  
43 symbionts (coral bleaching)<sup>5</sup>, or as damage to the coral colony due to various forms  
44 of necrotic loss of coral tissue<sup>2</sup>. On large scales, these processes may result in loss of  
45 coral cover, ultimately leading to the degradation of the reef structure and the loss  
46 of associated ecological and societal services<sup>4, 6, 7</sup>.

47 Many coral diseases are linked to specific pathogens whose abundance and  
48 virulence increase in response to environmental changes. Such changes may include  
49 nutrient loading, pollution, and temperature shifts<sup>8-11</sup>. One of the best characterized  
50 coral diseases is the infection of the Indo-Pacific coral *Pocillopora damicornis* by the  
51 bacterial pathogen *Vibrio coralliilyticus*<sup>9, 12, 13</sup>. The virulence of *V. coralliilyticus* is  
52 known to be positively correlated with increased temperatures<sup>9, 14-16</sup>. Increased  
53 ambient temperatures are further linked to accelerated vibrio growth rates<sup>9</sup>,  
54 enhanced chemotaxis and chemokinesis<sup>17</sup>, and secretion of matrix metalloproteases  
55 (MMPs)<sup>18</sup>. Nevertheless, a mechanistic understanding linking these traits to coral  
56 infection and disease progress is still lacking.

57 Many coral disease studies focus on monitoring coral colonies for the appearance of  
58 macroscopic signs of disease. These may include various forms of tissue  
59 discoloration, loss of the algal symbionts, or loss of tissue integrity<sup>19, 20</sup>. This  
60 tendency for macroscale studies is derived to a large extent from the complexity of  
61 the coral holobiont<sup>21, 22</sup>, and the difficulty in establishing a tractable model system  
62 facilitating more detailed observations<sup>22, 23</sup>. Currently, the main available tool  
63 enabling to link a potential pathogen to the site of tissue damage and to the host

64 response is histopathology<sup>23</sup>. However, as such disease manifestations only appear  
65 at advanced stages of the infection process, their use as disease indicators fails to  
66 capture the early stages of pathogen colonization and disease initiation<sup>23</sup>. We are  
67 thus lacking a mechanistic understanding of key steps in the infection process,  
68 including e.g. site of initial colonization, possible functions of specific disease  
69 markers such as MMP's, or where bacterial chemotaxis may come into play.  
70 Furthermore, there are still major knowledge gaps in our understanding of coral  
71 response at the onset of pathogenic infection.

72 Here we present a new microfluidic system, the Microfluidic Coral Infection (MCI)  
73 platform, developed specifically to tackle question related to the interaction  
74 between a bacterial pathogen and a coral colony at high spatio-temporal  
75 resolutions. This platform has several features distinguishing it from the previously  
76 published coral-on-a-chip (CoC) system<sup>24</sup>. The larger chamber volume and higher  
77 flow rates of the MCI, as compared to the CoC, facilitate the incubation of small coral  
78 fragments, preserving the colonial morphology of the coral colony. Moreover, the  
79 MCI design allows the continuous collection of exudates of the system for  
80 downstream analysis. The MCI further allows the incubation and tracking of up to 6  
81 individual coral fragments in separate chambers, facilitating flexible experimental  
82 design. Using the MCI system we track the microscopic encounter between the  
83 bacterial pathogen *V. coralliilyticus* and its coral host *P. damicornis*. Coupling the  
84 resulting time-lapse microscopic imaging with biochemical and microbial analyses  
85 of the system's outflow we identify early stages of the infection process that were  
86 not previously described. These results bring us a step closer towards a mechanistic  
87 understanding of microbial disease processes in reef building corals.

## 88 **Results**

### 89 **Live imaging of coral infection**

90 The progression of bacterial infection of small coral fragments was enabled using  
91 the MCI platform (Figure 1; Supplementary figure 1). To demonstrate the

92 robustness of this system, healthy *P. damicornis* fragments were incubated under  
93 controlled environmental conditions (temperature, light, flow, and water quality).  
94 Tissue integrity was continuously monitored by microscopic imaging. Natural coral  
95 Green Fluorescence Protein (GFP) served as a biomarker for coral health, while  
96 chlorophyll autofluorescence served to track localization and wellbeing of its  
97 zooxanthellae symbionts. No changes in coral morphology or behavior, and no  
98 extensive loss of algal symbionts (bleaching) were observed following 48 h of  
99 incubation under constant flow of filtered artificial seawater (FASW).

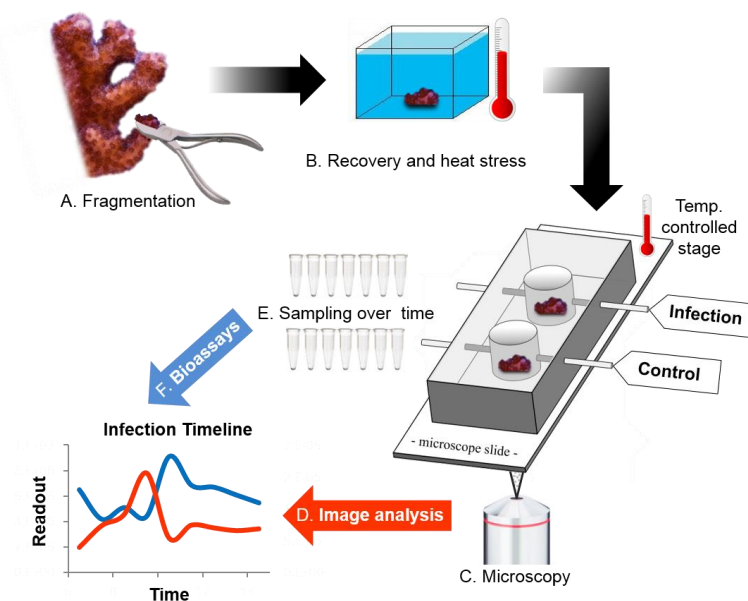

100

101 **Figure 1: Experimental work-flow for Microfluidic Coral Infection (MCI).** **A, B.** Small  
102 coral fragments (~3-5 mm), clipped from the branch tips of a *P. damicornis* colony, are kept  
103 in the main tank for recovery. Fragments are incubated for 3 days in a small (3.5 L)  
104 temperature-controlled tank filled with filtered aquarium water. Heat stress is induced by  
105 setting tank temperature to 30°C. **C.** Fragments are transferred to the MCI device placed on  
106 a temperature-controlled microscope stage. Infection is initiated by introducing DsRed-  
107 labelled *V. coralliilyticus* cells at desired duration and concentration through the inflow.  
108 Infection progress is tracked using epifluorescence and light microscopy at set intervals. **D.**  
109 Image analysis is used to quantify signal intensity and localization in all channels  
110 throughout the infection period. **E.** An automated fraction collector is used to sample flow  
111 through at set intervals throughout the experiment. Collected fractions are immediately  
112 cooled to below 2°C, with or without addition of fixative, for subsequent analysis. **F.**  
113 Collected fractions are analyzed by various bioassays, enabling correlation of microscopic  
114 observations and downstream analysis.

115 During infection experiments, challenged coral fragments were inoculated with  
116 either the bacterial pathogen *V. coralliilyticus* or the non-pathogenic *V. fischeri*, both  
117 labeled by DsRed<sup>24, 25</sup> to facilitate imaging. Non-challenged fragments received  
118 FASW throughout the experiment. Tissue integrity, coral behavior, and  
119 zooxanthellae fluorescence and localization, as well as localization of labelled  
120 bacteria in challenged fragments, were microscopically monitored throughout each  
121 experiment (Figure 2).

122 No morphological or behavioral changes were observed in non-challenged control  
123 fragments from all experiments (Fig. 2A; supplementary video 1). In fragments  
124 challenged by *V. fischeri* ( $10^8$  cells/ml), accumulation of DsRed-labelled bacteria was  
125 observed in the polyp pharynx over the 1<sup>st</sup> hour of inoculation. This was followed by  
126 moderate spewing of bacterial-laden mucus from all polyps (Fig 2B; supplementary  
127 video 2). No other morphological or behavioral changes were observed.

128 A markedly different response was observed in fragments challenged by *V.*  
129 *coralliilyticus* ( $10^8$  cells/ml). A total of 39 fragments, derived from 6 coral colonies,  
130 were challenged over the course of 18 separate experiments (Supplementary Table  
131 1). Within 15 minutes of inoculation, polyp contraction was observed in all *V.*  
132 *coralliilyticus*-challenged fragments. Pathogens accumulated in the coral pharynx  
133 over the next hour, with little or no accumulation observed on other parts of the  
134 coral surface (Figure 2C). Over the following 2-3 hours, polyps released copious  
135 amounts of viscous, bacterial-laden mucus, concomitant with substantial stretching  
136 of the coenosarc tissue connecting neighboring polyps (Figure 2C, Supplementary  
137 Video 3, 4).

138 Following this stage, experiment results followed one of two outcomes (Figure 3). In  
139 7 of the challenged experiments, consisting of 14 coral fragments, a complete or  
140 near-complete recovery was observed (Supplementary Table 1). In these fragments  
141 tissue confluence was retained, and within a few hours of inoculation polyps  
142 expanded, with no labeled *V. coralliilyticus* cells observed in the pharynx  
143 (Supplementary video 3).

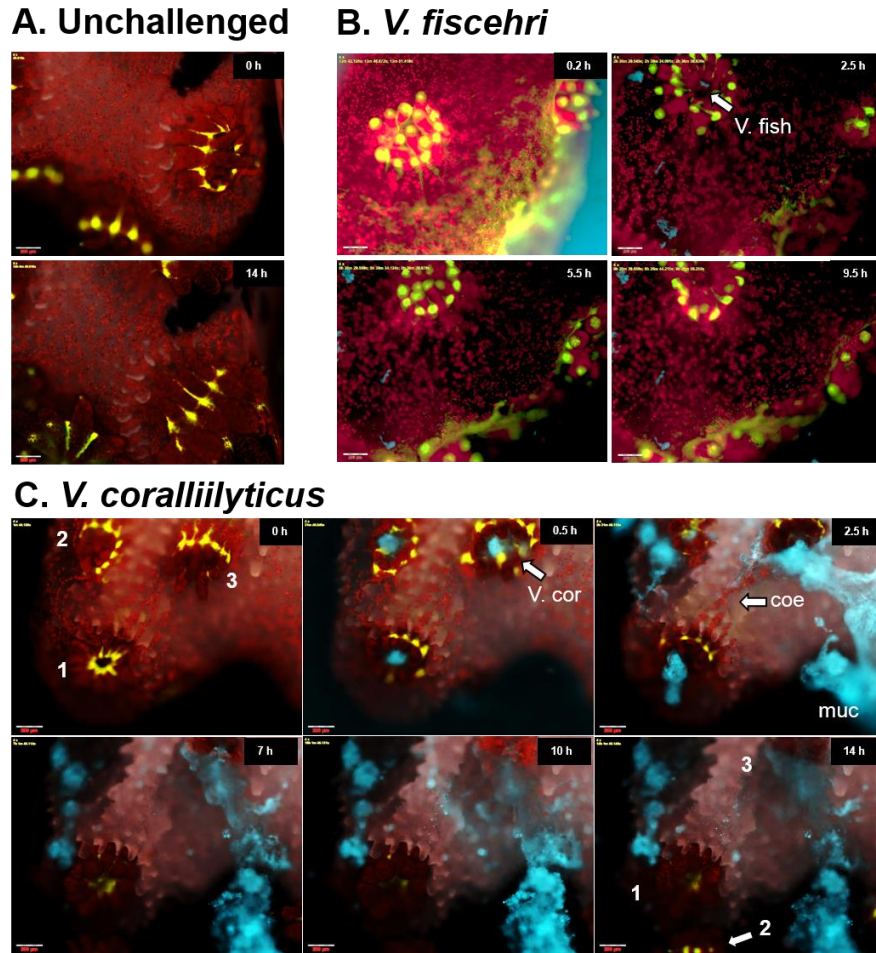

144

145 **Figure 2: Timeline of a coral infection.** **A.** Microscopic view of an unchallenged control *P.*  
146 *damicornis* fragment showing coral GFP (Green) and algal chlorophyll (Red). All non-  
147 challenged fragments appeared healthy at the end of the experiment (here 14 hours), with  
148 tentacles extended and no apparent bleaching or tissue loss. **B.** In *P. damicornis* fragments  
149 challenged by *V. fischeri*, slight accumulation of DsRed-labelled bacteria (cyan; *V. fish*) was  
150 observed in the coral pharynx. No disease-like symptoms were observed. **C.** Fragments  
151 challenged by *V. coralliilyticus* regularly displayed behavioral and morphological changes:  
152 Time '0 h'- Immediately prior to inoculation. Image shows three polyps (1-3) with partially  
153 extended tentacles. **0.5 h** - DsRed-labelled *V. coralliilyticus* (Cyan) accumulate at the polyp  
154 pharynx, but not on other exposed areas of the colony. **2.5 h** - Polyps secrete large amounts  
155 of mucus (muc), clearly visible due to large numbers of *V. coralliilyticus* cells adhering to it.  
156 Tearing of coenosarc tissue (coe) is observed. **7 h** - Coenosarc is degraded and polyps  
157 separated. Polyp 2 underwent polyp bail-out and is lost from the field of view. Polyp 3 is dead,  
158 with tissue degraded and GFP signal lost, although some chlorophyll autofluorescence is still  
159 observed. **10 h** - *V. coralliilyticus* accumulates on the exposed skeleton. **14 h** - At the end of  
160 the experiment polyp 1 remains viable, despite complete loss of surrounding tissue. A bailed-  
161 out polyp (possibly polyp 2) is visible at the bottom of the image. Vacant calyx of polyp 3  
162 is marked. Scale for all images are 200  $\mu$ m.

163 Contrastingly, in the remaining 11 experiments, consisting of 25 challenged  
164 fragments, a clear pathology was observed (Figure 2C; Supplementary video 4). In  
165 these fragments, mucus spewing was followed by tearing of the coenosarc, leading  
166 to the separation of neighboring polyps and consequently loss of colony integrity  
167 (Fig. 2C). The majority of polyps in these experiments then underwent necrosis,  
168 manifested as visible loss of tissue integrity, accompanied by a gradual decay in GFP  
169 fluorescence (Figure 2C [Polyp 3]; Figure 4B; Supplementary figure 2). In 23 of these  
170 25 fragments partial survival was observed in the form of polyp bail-out<sup>24, 26</sup>. In 4 of  
171 these 23 fragments, individual polyps survived and remained attached to the  
172 skeleton at the end of the experiment (Figure 2C; Figure 3; Supplementary Video 4;  
173 Supplementary Table 1).

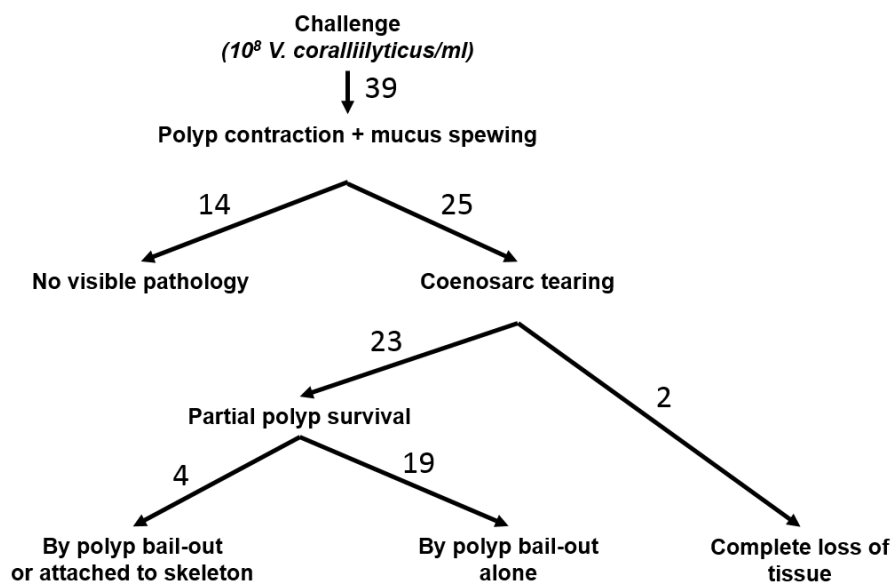

174

175 **Figure 3. A roadmap of outcomes of for 39 *P. damicornis* fragments challenged by *V.***  
176 ***coralliilyticus*.** Polyp retraction and subsequent mucus spewing was observed in all  
177 fragments. In symptomatic fragments, this was followed by separation of neighboring polyps  
178 through coenosarc tearing. Individual polyps underwent one of three different fates (survival,  
179 bail-out or death).

## 180 Lesion infection

181 A slightly modified infection sequence was observed in fragments with minor  
182 lesions in the coenosarc tissues. *V. coralliilyticus* cells regularly accumulated at the  
183 lesion edge (Figure 4; Supplementary Video 5) within the first hour of inoculation.  
184 Further bacterial accumulation or proliferation was observed over the next hours,  
185 accompanied by tissue necrosis manifested as rapid tearing or degradation of the  
186 ceenosarc tissue and death of neighboring polyps.

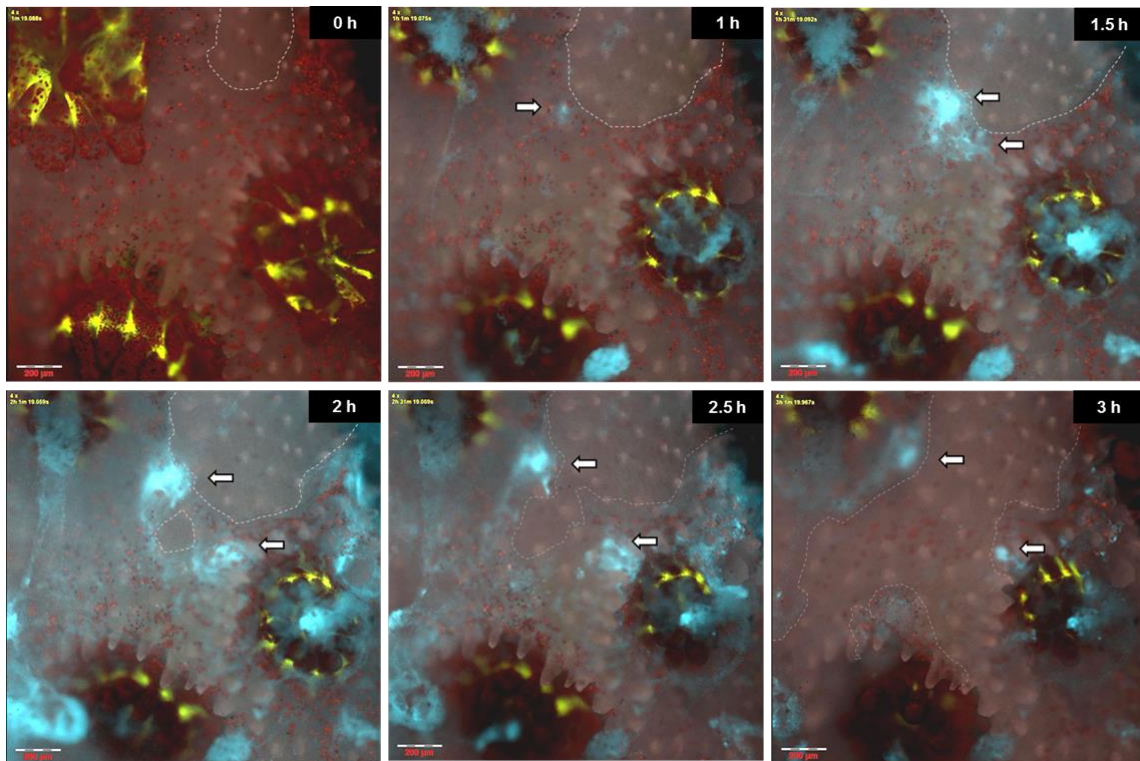

187  
188 **Figure 4: Tissue lesions allow rapid colonization and infection.** Time '0' h – Infected  
189 fragmented immediately prior to inoculation. Coral GFP (Green) and algal chlorophyll (Red)  
190 are shown on a greyscale background. Dashed line marks the borders of a small lesion  
191 approximately 300 μm in diameter. **1 h** – *V. coralliilyticus* cells (Cyan) accumulate at the  
192 lesion edge (arrow). **1.5 h – 3 h** – further colonization of the torn tissue is followed by rapid  
193 lesion expansion and death of neighboring polyps. The complete sequence from this  
194 experiment is provided in supplementary video 4. Scale bars are 200 μm.



## 195 Quantitative image analysis

196 Quantification of fluorescence intensity derived from the different components of  
197 the holobiont (GFP for coral tissue, chlorophyll for algal symbionts and DsRed for *V.*  
198 *coralliilyticus*) provided further information on the infection progression in  
199 challenged fragments (Figure 5A,B). A gradual but constant decrease in coral GFP  
200 intensity, beginning approximately 2 h post inoculation, was consistently observed  
201 in dying fragments, but not in non-challenged controls or in challenged,  
202 asymptomatic fragments (Figure 5A, B). The most prominent feature in the resulting  
203 DsRed intensity profile was a large peak spanning the first 2 hours of each  
204 experiment, reflecting the inflow of labeled *V. coralliilyticus* during inoculation  
205 (Figure 4B). A smaller peak in the DsRed channel regularly appeared between 6 and  
206 10 hours following inoculation. No distinct patterns were observed in chlorophyll  
207 autofluorescence within the timeframe of the infections described here.

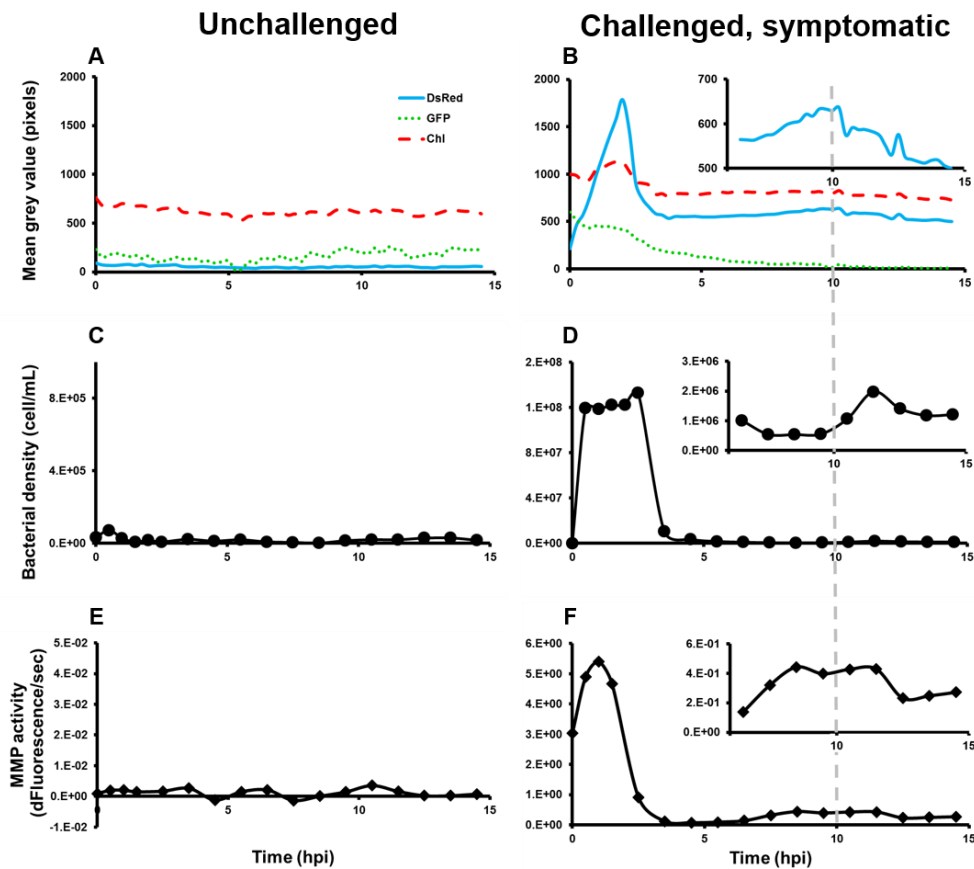

208

209 **Figure 5: Quantitative analysis of microscope images and system exudates provide**  
210 **further insights into the timeline of coral infection. A, B** – Quantification of fluorescence  
211 signals from GFP (green), Chlorophyll (red) and DsRed labeled *V. coralliilyticus* (cyan) in  
212 unchallenged (**A**) and challenged by *V. coralliilyticus* (**B**) fragments. High levels of DsRed  
213 signal over the first 2 hours of experiment in **B** correspond to pathogen inoculation and  
214 settlement of the coral pharynx. A gradual decrease in GFP signal starting approximately 2  
215 hours post-infection indicates death and disintegration of the coral host. The increase in  
216 DsRed signal between 6 and 10 h (**B**, inset) likely indicates pathogen proliferation at the  
217 expense of the dying coral. **C, D**. Quantification of total bacterial density in the outflow of a  
218 control (**C**) and infected (**D**) chambers. High bacterial load in **D** over the first 2 hours  
219 indicate relatively low attachment of inoculated *V. coralliilyticus* to the coral host. A slight  
220 increase in bacterial density starting at 10 h (**D**, inset), termed “late burst”, is likely driven  
221 by pathogens, and possibly other bacteria, released from the dying tissue. **E, F**.  
222 Quantification of matrix metalloproteinases (MMPs) activity in the outflow of a control (**E**)  
223 and infected (**F**) chambers. Initial high activity corresponds to MMPs activity in the  
224 inoculum. Increased activity starting at 7 hours (**F**, inset) may indicate increased MMPs  
225 production by *V. coralliilyticus* as it breaks down the host tissue.

226

## 227 **Downstream microbial and biochemical analysis of MCI exudates**

228 Additional insight into the infection process was gained by time-resolved  
229 measurement of microbial abundance and MMP activity in the MCI exudates (Figure  
230 5C-F; Supplementary figures 3, 4). The highest values for both MMP activity and cell  
231 abundance were measured during the initial two-hour inoculation period. In all  
232 challenged fragments, bacterial abundance in the exudates decreased following  
233 inoculation from  $10^8$  cells/mL to approximately  $10^6$  cells/mL (Figure 5D;  
234 Supplementary figures 3A, 4A), with a corresponding decrease in MMP activity (Fig.  
235 5F; Supplementary figure 3B, 4B). In challenged, symptomatic fragments a  
236 subsequent rise of up to 10 fold in MMP activity was regularly observed starting at  
237 4-6 h post inoculation (Fig. 5F; Figure 6; Supplementary figure 4B). This increase  
238 was followed by an increase in bacterial load of up to half an order of magnitude at  
239 7-10 hours post inoculation (Figure 5D; Supplementary figure 4A). These late  
240 increase in bacterial abundance and MMP activity were not observed in either the  
241 challenged, non-symptomatic fragments or in fragments challenged with *V. fischeri*.  
242 Comparing total and DsRed-labeled bacterial numbers in the outflow of one

243 experiment revealed that the portion of DsRed labelled bacterial cells went down  
244 from 100% labeling in the inoculum to 70-90% in the following 8h, and further  
245 decrease to 60% during the subsequent rise in bacterial abundance starting at 9.5 h  
246 from inoculation (Supplementary Figure 5).

247 By integrating the various measurement and observations from all MCI experiments  
248 into a single timeline we were able to generate the most detailed description to-date  
249 of the infection of a reef building coral by a bacterial pathogen (Fig. 6). This unified  
250 timeline reveals the conservation of the different stages described here, as well as  
251 some variability in the relative timing of specific events, particularly in the later  
252 stages. From this integrated timeline it is evident that initial polyp contraction and  
253 mucus spewing was an immediate response shared by all fragments regardless of  
254 their ultimate fate. The rise in MMP activity was always preceded by the onset of  
255 tissue lysis, and was generally preceded by GFP decay. The rise in bacterial  
256 abundance in the effluent was generally observed following the rise in MMP activity.  
257 In the majority of actively infected fragments, the entire infection process was  
258 complete within 10-15 hours following inoculation.

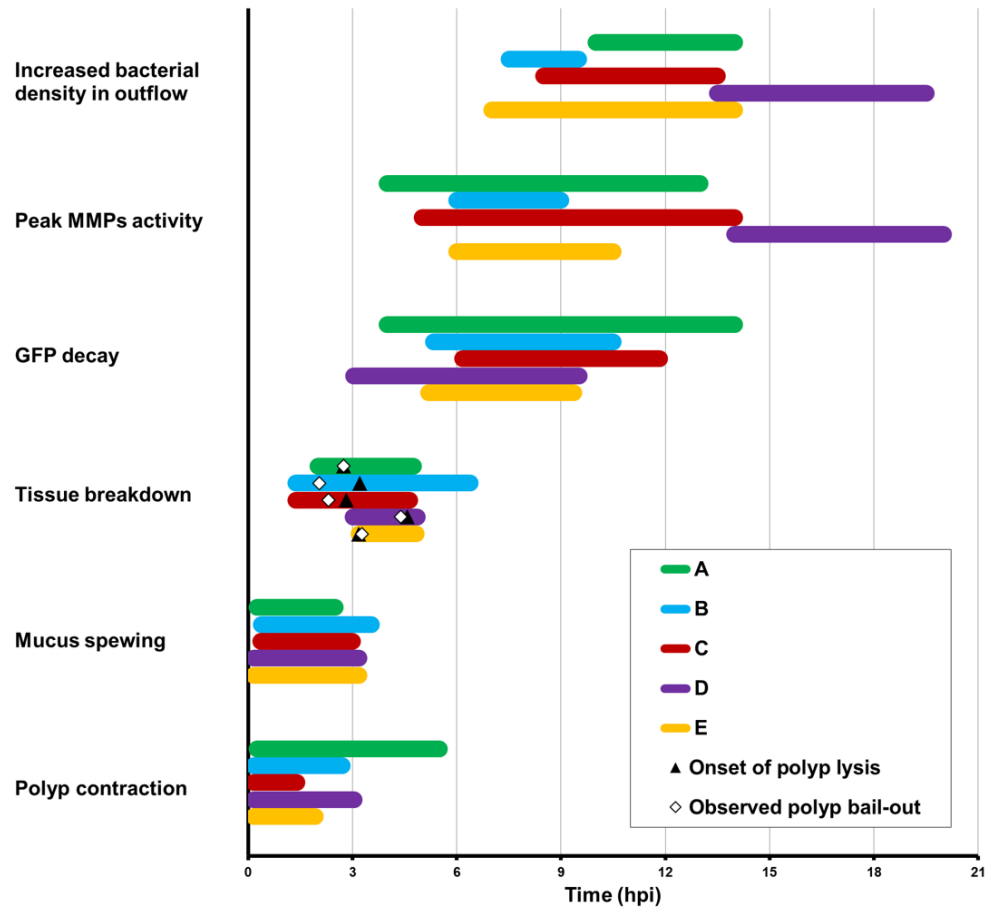

259

260 **Figure 6: Summary of key infection phases.** Results from 5 representative experiments  
261 using fragments from three *P. damicornis* colonies (A-E; see details in Supplementary Table  
262 1). Only fragments showing clear symptoms following challenge by *V. coralliilyticus* are  
263 represented. The overall sequence of morphological, biochemical and microbial events is  
264 highly conserved although exact timing of events varied. Colored bars represent approximate  
265 duration of observation or measurement for each experiment. Discrete observations related  
266 to colony breakdown, including polyp bail-out and tissue lysis, are marked on the  
267 corresponding bar as (◊) and (▲), respectively.

## 268 **Discussion**

269 Coral disease progression is often studied at scales ranging from single colonies to  
270 the entire reef, thus overlooking the microscale processes governing host-pathogen  
271 interactions. While important insights into disease etiology have been gained by  
272 careful pathological and histological studies<sup>23, 27-30</sup>, such studies are mostly limited  
273 to snapshots of the disease process at acute and morphologically recognizable  
274 phases<sup>8, 13, 31-33</sup>. Thus, an *in vivo* description of the sequence of microscopic events  
275 underlying the process of coral infection is still missing. The current work aims to  
276 bridge this gap, by studying coral disease under controlled laboratory conditions, at  
277 temporal and spatial scales relevant to the microscopic interactions between a  
278 bacterial pathogen and its coral host.

279 Using live-imaging microscopy we are able, for the first time, to visualize *V.*  
280 *coralliilyticus* as it colonizes and infects its coral host. Rather than colonizing the  
281 entire colony surface, we show that bacterial accumulation occurs primarily at the  
282 polyp pharynx, which points towards a gastrovascular route of infection. This is in  
283 agreement with observations reported in our previous work, demonstrating  
284 accumulation of *V. coralliilyticus* in the gastrovascular cavity of micropropagated *P.*  
285 *damicornis* polyps<sup>24</sup>. Following inoculation the majority of coral fragments displayed  
286 a clear pathology leading to colony disintegration followed by the release of *V.*  
287 *coralliilyticus* cells to the surrounding water. Accumulation at the coral pharynx was  
288 also observed in coral fragments challenged with *V. fischeri*, but to a lesser extent  
289 and no apparent pathology. Colonization of the colony surface in our experiments  
290 appeared to be limited to sites of tissue lesions, which may serve as hotspots of  
291 bacterial infection.

292 Beyond tracking of the bacterial pathogen, the MCI provides us with the unique  
293 ability to observe microscale patterns of coral behavior, a subject that is rarely  
294 considered in the context of coral disease. We were thus able to describe and  
295 characterize the sequence of behavioral responses of the coral host following a  
296 bacterial challenge. We observed specific coral reactions immediately following

297 inoculation with pathogenic *V. coralliilyticus*, particularly the retraction of coral  
298 polyps into their calices followed by mucus spewing, that were distinct from those  
299 observed following a challenge by the non-pathogenic *V. fischeri*. Polyp retraction is  
300 a universal response of corals to physical or environmental stress<sup>34</sup>, indicating that  
301 the coral is sensing, and responding to, the presence of pathogens or their exudates.  
302 Moreover, as polyp retraction minimizes intake of water into the polyp  
303 gastrovascular system, and thus the internalization of planktonic food<sup>35-37</sup>, this  
304 behavior may also provide a means for the coral to avoid further accumulation of  
305 pathogens in its gastric cavity. The subsequent spewing of viscous, bacterial-laden  
306 mucus from the polyp mouth may be interpreted as further attempt by the coral to  
307 rid itself of the ingested pathogens, not unlike the coughing of phlegm during a  
308 throat or lung infection. Again, mucus spewing is a common coral response to high  
309 loads of food or particulate matter in surrounding water<sup>38-40</sup>. However, considerably  
310 less mucus was secreted in response to challenge with *V. fischeri*, suggesting that  
311 coral challenged by *V. coralliilyticus* experience stress that is not directly related to  
312 the presence of bacterial cells in the surrounding water. Thus, polyp contraction and  
313 mucus spewing may be considered an important coral defense behavior when faced  
314 with high loads of bacterial pathogens in their environment.

315 In all *V. coralliilyticus*-challenged fragments, mucus spewing was invariably followed  
316 by stretching of ceenosarc tissues. In symptomatic fragments, this ultimately led to  
317 tearing of the tissue and separation of adjacent polyps. Surprisingly, many of these  
318 isolated polyps survived, some remaining attached to the skeleton while most  
319 undergoing polyp bail-out<sup>24, 26</sup>. Notably, bailed out polyps collected and maintained  
320 in filtered sea-water following infection experiments remained viable for over two  
321 weeks, suggesting that these polyps were indeed able to overcome the invading  
322 pathogen. Polyp separation thus provides the coral with an additional defense layer,  
323 enabling it to quarantine disease by “sacrificing” infected polyps. This response  
324 likely prevents pathogens from spreading to the rest of the colony through the  
325 common gastrovascular system, similar to plant hypersensitive response<sup>41</sup>. Polyp  
326 bail-out may further promote the survival of the genotype by salvaging individual

327 polyps from doomed colonies, which may settle and regenerate into new colonies  
328 where conditions are more favorable<sup>24, 26, 42</sup>.

329 A major question arising from our results relates to the function of matrix  
330 metalloproteases (MMP) in the infection sequence. MMPs were previously suggested  
331 to be a key virulence factor of *V. coralliilyticus*<sup>18</sup>. In our experiments, despite the  
332 exposure of all treated corals to unnaturally high levels of MMPs secreted by the  
333 bacterial pathogens during inoculation step (Figure 5B), over 30% of the corals  
334 ultimately survived the infection. Thus, under the conditions tested, MMP activity  
335 alone was not sufficient to kill the corals. This is in agreement with previous work  
336 reporting similar infectivity of a different strain of *V. coralliilyticus* following  
337 deletion of a gene encoding MMP production<sup>12</sup>. In our experiments we observe a  
338 rise in MMP activity at a relatively late stage of the infection, when polyps are likely  
339 already dead or dying as indicated by the decay in GFP signal. The secretion of  
340 metalloenzymes at this stage suggests their involvement in the breakdown of coral  
341 tissue, as a means for *V. coralliilyticus* to scavenge nutrients and essential  
342 metabolites from the dying colony.

343 An interesting observation arising from our experiments was that a large fraction of  
344 the microorganisms released in the system's exudates over the course of the  
345 infection were not DsRed-labeled (Supplementary figure 5). While this may be  
346 explained by the loss of DsRed-encoding plasmids from transformed *V.*  
347 *coralliilyticus*, an alternative explanation is that additional bacterial populations,  
348 formerly part of the coral holobiont, benefit from the lysis of the coral tissue and the  
349 associated abundance of nutrients. Future analysis of the bacterial community  
350 released from corals infected under similar settings may provide further insights  
351 into the identity and nature of such rogue members of the coral microbiome.

352 One of our goals in constructing the MCI system was to elucidate the route of  
353 infection and disease initiation. Previous studies demonstrated involvement of  
354 motility in pathogenic *Vibrio*-coral interactions, and suggested that chemotaxis  
355 towards coral mucus facilitates host-localization and colonization of the coral

356 surface<sup>43-46</sup>. This view is challenged by a recent work demonstrating increased  
357 infectivity of *V. coralliilyticus* cells with impaired chemotaxis<sup>47</sup>, similar to results in *V.*  
358 *cholera*<sup>48</sup> but differing from the fish pathogen *V. anguillarum*<sup>49</sup>. Indeed, bacterial  
359 chemotaxis occurs over relatively short distances (100's of microns) and requires a  
360 stable and continuous gradient of the chemoattractant<sup>50</sup>. As recently demonstrated,  
361 such conditions are not typically found near the surface of scleractinian corals.  
362 Ciliary flows exceeding 1 mm/s at the coral surface actively mix the coral's boundary  
363 layer by creating vortices extending up to 2 mm into the surrounding water<sup>51</sup>. These  
364 rapid currents, ten times the swimming speed of *V. coralliilyticus*<sup>17</sup>, disrupt diffusion  
365 gradients that would otherwise develop in the coral's boundary layer, while  
366 sweeping away any pathogens reaching the coral's surface. Thus, ciliary flows are  
367 likely to prevent pathogens of scleractinian corals from chemotaxing towards their  
368 potential hosts.

369 This putative role of cilia as a physical barrier to bacterial colonization is further  
370 supported by the observed accumulation of pathogens at tissue lesions, where  
371 tissue confluence is breached and ciliary motion is likely disrupted. Such local  
372 patches of reduced ciliary flow, possibly enriched with infochemicals exuded from  
373 the torn tissue, may indeed facilitate bacterial chemotaxis. This may account for the  
374 rapid colonization and infection at lesion sites in our experiments. Indeed, previous  
375 studies showed that wounds caused by trauma to coral colonies provide "hot spots"  
376 for initiation of various coral diseases, including white plague, brown and black  
377 band, and others<sup>52-54</sup>. Here we show that even minor lesions, under the right  
378 conditions, may serve as a possible point of entry for bacterial pathogens.

379 The question of chemotaxis is also relevant to the accumulation of pathogens at the  
380 coral pharynx. Significantly, while pathogen accumulation at lesion sites was only  
381 observed 45-60 minutes from inoculation, comparable accumulation at the coral  
382 pharynx is observed already 10-15 minutes into the experiment, suggesting  
383 different mechanism may be driving the two phenomena. We suggest that  
384 accumulation at the pharynx may be driven by the active uptake of water into the  
385 coral's gastrovascular system prior to polyp contraction, as part of ongoing feeding



386 and gas exchange processes<sup>37, 55-57</sup>. Once inside the gastrovascular channels, where  
387 flow is likely to be laminar and boundaries within easy reach, chemotaxis may well  
388 play a part in bacterial colonization of the gastrovascular mucus.

389 The use of small coral fragments in our system allowed us to perform a relatively  
390 large number of experiments, using fragments from multiple colonies. An  
391 unexpected result was the heterogeneity in the response of different *P. damicornis*  
392 colonies to *V. coralliilyticus* infection (Supplementary Table 1). While some colonies  
393 were highly susceptible to infection (e.g. colonies 2 and 5), other colonies had  
394 remarkably high survival rates (e.g. colonies 3 and 4). The mechanisms underlying  
395 these differences are not clear. Genetic differences, life histories or microbiome  
396 composition may all contribute to coral resilience<sup>58-62</sup>. Heterogeneity was also  
397 observed at the response of individual polyps, and that too requires further  
398 investigation. Future experiments examining the genetic and epigenetic (including  
399 microbiome composition) background of different colonies may help resolve some  
400 of these questions.

401 It is important to note that in all bacterial challenge experiments reported here, we  
402 used approximately  $10^8$  *V. coralliilyticus* cells/ml, a number that is clearly unrealistic  
403 ecologically. Inoculations with  $10^7$  cells/ml or less did not result in coral mortality  
404 under the conditions tested, even following 72 hours of subsequent incubation (data  
405 not shown). While this may signify a limitation of the short duration of our  
406 experiments, it is notable that previous experiments reported for the same coral-  
407 pathogen system also used *V. coralliilyticus* concentrations of between  $10^7$  and  $10^8$   
408 cells/ml to induce infection<sup>9, 14, 46</sup>. Ushijima and colleagues<sup>47</sup> determined the  
409 infectious dose of *V. coralliilyticus* towards *Montipora* to be between  $10^7$  and  $10^8$   
410 cells/ml. This suggests a compatible coral immunity and high resilience to the low  
411 densities of planktonic *V. coralliilyticus* prevalent in the reef environment<sup>63</sup>. An  
412 alternative route for coral infection under natural conditions, which remains to be  
413 explored, is the ingestion of vibrio-laden marine snow or infected zooplankton,  
414 delivering an infective dose of bacterial pathogens directly into the corals'  
415 gastrovascular system<sup>64</sup>.

416 The MCI experimental setup, presented here for the first time, combines advanced  
417 live imaging microscopy, microfluidics and time resolved sampling and analysis of  
418 the system effluents enabling the evaluation of coral-pathogen interactions at  
419 unprecedented detail. This revealed several hitherto unknown aspects of coral  
420 disease, including localization of pathogens at the onset of infection, behavioral  
421 defensive responses of the coral host, and the heterogeneity of polyp fate following  
422 infection, and defined distinct phases of the infection process. Future application of  
423 approaches similar to that described here will facilitate more detailed  
424 understanding of the complex and ecologically important interactions occurring  
425 between corals and their bacterial pathogens. This platform will provide a  
426 foundation for future studies aiming at elucidating the versatile adaptive response  
427 of the fragile coral ecosystems to fluctuating environments.

## 428 **Methods**

### 429 **MCI experimental setup**

430 Microfluidic chambers were fabricated *in-house* as follows: A 5x1.5 cm slab was cut  
431 out of a 5 mm thick sheet of polydimethylsiloxane (PDMS) silicone elastomer  
432 (Sylgard® 184) using a utility knife. 4-6 Ø8mm wells were punched into the  
433 resulting slab using a biopsy punch of the same diameter, forming chambers of  
434 approximately 250µL. Inlet and outlet holes were punched into opposing sides of  
435 each chamber using a 1 mm biopsy punch (Integra®, Fischer Scientific).  
436 (Supplementary figure 1). The PDMS slab was then bonded to a glass microscope  
437 slide by exposing both to oxygen plasma for one minute using a laboratory Corona  
438 Treater (Electro-Technic Products). Each chamber was fitted with polyethylene inlet  
439 and outlet tubing (BPE-60, Instech Laboratories) (Fig 1). The assembled device was  
440 placed on a temperature controlled microscope stage. Small *P. damicornis* fragments  
441 (3-5 mm) were placed in each chamber and chambers sealed with ApopTag® Plastic  
442 cover slips (Merck). Flow (2.6 mL hour<sup>-1</sup>) was generated using a peristaltic pump  
443 (Ismatec) connected to the outlet tube. The input tube was connected to a flask

444 containing FASW (0.22  $\mu\text{m}$ ). Inoculation was carried out by transferring the free end  
445 of the inlet tube to a flask containing FASW supplemented with  $10^8$  of either *V.*  
446 *coralliilyticus* or *V. fischeri* for 2 h, and then transferring back to the FASW-  
447 containing flask.

448 The outlet stream from each chamber was continuously collected using a 4 channel  
449 fraction collector (Gilson Inc.) into 2 ml Eppendorf tubes, with tubes for each stream  
450 changed at 30 min intervals. Tubes were maintained in an aluminum tube rack  
451 placed in an ice bath to maintain contents at 0-1°C. Every 2<sup>nd</sup> tube was  
452 supplemented in advance with paraformaldehyde (PFA) to a final concentration of  
453 approximately 1%, enabling subsequent bacterial quantification using flow  
454 cytometry. Fractions from tubes without fixative were centrifuged, and supernatant  
455 used for quantification of MMP enzymatic activity.

#### 456 **Coral collection and handling.**

457 All *P. damicornis* colonies used in this study were collected from a coral nursery  
458 located at a depth of 8 m off the pier of the Inter-University Institute, Eilat, Israel  
459 (Israel nature and parks authority permit No # 2014/40327 ). Collected corals were  
460 maintained in an aquarium at the Weizmann Institute of Science. Small branch tips  
461 were clipped from the colonies and left in the main tank for recovery for at least one  
462 week. Prior to each experiment some fragments were transferred to a separate 4 L  
463 tank filled with FASW and incubated at 31°C for a period of 3 days. The fragments  
464 were then transferred to the MCI device for microscopic observation. At the  
465 beginning of each experiment, prior to inoculation, fragments were acclimated on  
466 the stage for at least 3 hours with a constant flow of filtered aquarium water.

#### 467 ***Vibrio coralliilyticus* transformation to express DsRed**

468 Infection experiments were performed using the *V. coralliilyticus* strain YB2 labelled  
469 with a plasmid encoding for a potent variant of DsRed2 fluorescent protein<sup>25</sup> as  
470 described previously<sup>24</sup>. For each experiment, DsRed-labelled *V. coralliilyticus* were  
471 grown overnight from glycerol stock at 30 °C in Zobell Marine Broth. Bacteria were

472 then centrifuged (3500 G, 5 minutes) and resuspended in FASW. Tubes were then  
473 incubated at 30°C with no shaking to allow sinking of non-motile bacteria.

## 474 **Infection assays procedure**

### 475 **Experimental procedure**

476 The general work flow and infection scheme is illustrated in **Error! Reference**  
477 **source not found.** Inoculation was carried out by flowing a suspension of DsRed-  
478 labeled *V. coralliilyticus* or *V. fischeri* (approximately 10<sup>8</sup> cells/mL) into the chamber  
479 over a period of two hours. Inlet flow was then switched to filtered aquarium water  
480 for the remaining incubation. Live imaging microscopy was carried out using a fully  
481 motorized inverted fluorescence microscope (Olympus IX81) equipped with a  
482 Coolsnap HQ2 CCD camera (Photometrics). Throughout the infection experiments,  
483 multichannel micrographs of the fragments were captured every 15 minutes at 4X  
484 magnification. This enabled visualization of the coral-tissue GFP, zooxanthellae  
485 chlorophyll, and DsRed fluorescence, alongside a bright-field channel.

### 486 **Image analysis**

487 Image analysis was carried out using imageJ (FIJI), by measuring mean grey  
488 intensity (in pixels) of the entire frame in each channel (GFP, Chlorophyl, and  
489 DsRed) captured at every time point.

### 490 **Downstream exudate analysis**

491 To couple the visual observations with direct microbial and biochemical  
492 measurements, each chamber's effluents was continuously collected in a time  
493 resolved manner using a fraction collector and immediately cooled to between 0  
494 and 2°C (Figure 1, step 5). Odd numbered fractions (1.3 mL) each were immediately  
495 fixed in 1% PFA in FASW. 20 µL of each sample was diluted 10 fold and stained with  
496 nucleic acid stain SYBR-gold (Invitrogen). Cell abundance was measured using a  
497 flow cytometer (iCyt Eclipse, excitation: 488 nm, emission: 500–550 nm). Even  
498 numbered fractions were collected with no fixation and filtered through 0.22 µm

499 syringe filter (Millipore). Filtrate was used to estimate MMP activity using a specific  
500 fluorescent substrate (Calbiochem MMP-2/MMP-7 Substrate, Fluorogenic) in a  
501 microplate reader (Tecan Infinite® M200pro). Fluorescence (excitation :325 nm,  
502 emission: 393 nm) was measure every 90 seconds at 30°C for 40 min. We used a  
503 specific MMPs substrate to demonstrate that isolated *V. coralliilyticus* secretes  
504 MMPs to the culture medium during different growth phases (Supplementary figure  
505 6A). This specific activity was confirmed by inhibition with GM6001, a broad-  
506 spectrum MMPs inhibitor with inhibition capacity of  $IC_{50} = 5 \mu M$  (Supplementary  
507 figure 6B).

508

#### 509 **Author contributions**

510 ARG and OHS developed the MCI experimental setup. ARG transformed *V.*  
511 *coralliilyticus* and performed the experiments and image analysis. EKW contributed  
512 to experimental design and interpretation of results. AV contributed to the design  
513 and evaluation of the experiments and the overview of all aspects of the project.  
514 ARG, OHS, EKW, and AV wrote the manuscript.

#### 515 **Acknowledgements**

516 *V. coralliilyticus* transformation was carried out with the help of D. Schatz using  
517 materials and protocols generously provided by Prof. E. Stabb (Franklin College,  
518 University of Georgia). Inna Solomonov and Irit from the Irit Sagee lab, Weizmann  
519 Institute of Science, are assisted with establishment and validation of the MMP  
520 activity essay. This work was supported by the Human Frontiers in Science Program  
521 (award #RGY0089), the Weizmann - EPFL Collaboration Program (grant number:  
522 721236), and the Angel Faivovich Foundation for Ecological research.

## 523 **References**

- 524 1. Hoegh-Guldberg, O. & Bruno, J. F. The impact of climate change on the world's  
525 marine ecosystems. *Science* **328**, 1523-1528 (2010).
- 526 2. Rosenberg, E., Kellogg, C. A. & Rohwer, F. L. Coral microbiology. *OCEANOGRAPHY-*  
527 *WASHINGTON DC-OCEANOGRAPHY SOCIETY-* **20**, 146 (2007).
- 528 3. Rohwer, F., Youle, M. & Vosten, D. in *Coral reefs in the microbial seas* (Plaid Press,  
529 2010).
- 530 4. Haas, A. F. *et al.* Global microbialization of coral reefs. *Nature microbiology* **1**, 16042  
531 (2016).
- 532 5. Roth, E., Jeon, K. & Stacey, G. Homology in endosymbiotic systems: The  
533 term 'symbiosome'. (1988).
- 534 6. Zvuloni, A. *et al.* Spatio-temporal transmission patterns of black-band disease in a  
535 coral community. *PLoS One* **4**, e4993 (2009).
- 536 7. Peters, E. C. in *Coral Reefs in the Anthropocene* 147-178 (Springer, 2015).
- 537 8. Kushmaro, A., Rosenberg, E., Fine, M., Ben Haim, Y. & Loya, Y. Effect of temperature  
538 on bleaching of the coral *Oculina patagonica* by *Vibrio* AK-1. *Mar. Ecol. Prog. Ser.* **171**,  
539 131-137 (1998).
- 540 9. Ben-Haim, Y. *et al.* *Vibrio coralliilyticus* sp. nov., a temperature-dependent pathogen  
541 of the coral *Pocillopora damicornis*. *Int. J. Syst. Evol. Microbiol.* **53**, 309-315 (2003).
- 542 10. Rosenberg, E., Kushmaro, A., Kramarsky-Winter, E., Banin, E. & Yossi, L. The role  
543 of microorganisms in coral bleaching. *The ISME journal* **3**, 139-146 (2009).
- 544 11. Kramarsky-Winter, E., Downs, C., Downs, A. & Loya, Y. Cellular responses in the  
545 coral *Stylophora pistillata* exposed to eutrophication from fish mariculture. *Evol. Ecol.*  
546 *Res.* **11**, 381-401 (2009).
- 547 12. Santos, E. *et al.* Genomic and proteomic analyses of the coral pathogen *Vibrio*  
548 *coralliilyticus* reveal a diverse virulence repertoire. *The ISME journal* **5**, 1471-1483  
549 (2011).
- 550 13. Y., B. & E., R. A novel *Vibrio* sp. pathogen of the coral *Pocillopora damicornis*. *Mar.*  
551 *Biol.* **141** (2002).
- 552 14. Vidal-Dupiol, J. *et al.* Coral bleaching under thermal stress: putative involvement  
553 of host/symbiont recognition mechanisms. *BMC physiology* **9** (2009).

- 554 15. Zvuloni, A., Artzy-Randrup, Y., Katriel, G., Loya, Y. & Stone, L. Modeling the impact  
555 of white-plague coral disease in climate change scenarios. *PLoS computational biology*  
556 **11**, e1004151 (2015).
- 557 16. Wright, R. M. *et al.* Intraspecific differences in molecular stress responses and  
558 coral pathobiome contribute to mortality under bacterial challenge in *Acropora*  
559 *millepora*. *Sci. Rep.* **7**, 2609-017-02685-1 (2017).
- 560 17. Garren, M., Son, K., Tout, J., Seymour, J. R. & Stocker, R. Temperature-induced  
561 behavioral switches in a bacterial coral pathogen. *The ISME journal* **10**, 1363-1372  
562 (2016).
- 563 18. Sussman, M. *et al.* *Vibrio* zinc-metalloprotease causes photoinactivation of coral  
564 endosymbionts and coral tissue lesions. *PLoS One* **4**, e4511 (2009).
- 565 19. Rosenberg, E. & Kushmaro, A. in *Coral Reefs: An Ecosystem in Transition* 451-464  
566 (Springer, 2011).
- 567 20. Bourne, D. *et al.* Microbial disease and the coral holobiont. *Trends Microbiol.* **17**,  
568 554-562 (2009).
- 569 21. Pollock, F. J., Morris, P. J., Willis, B. L. & Bourne, D. G. The Urgent Need for Robust  
570 Coral Disease Diagnostics. *PLoS Pathog* **7**, e1002183 (2011).
- 571 22. Weis, V., Davy, S., Hoegh-Guldberg, O., Rodriguez-Lanetty, M. & Pringle, J. Cell  
572 biology in model systems as the key to understanding corals. *Trends in ecology &*  
573 *evolution* **23**, 369-376 (2008).
- 574 23. Work, T. & Meteyer, C. To Understand Coral Disease, Look at Coral Cells.  
575 *EcoHealth*, 1-9 (2014).
- 576 24. Shapiro, O. H., Kramarsky-Winter, E., Gavish, A. R., Stocker, R. & Vardi, A. A coral-  
577 on-a-chip microfluidic platform enabling live-imaging microscopy of reef-building  
578 corals. *Nature communications* **7**, 10860 (2016).
- 579 25. Dunn, A. K., Millikan, D. S., Adin, D. M., Bose, J. L. & Stabb, E. V. New rfp- and pES213-  
580 derived tools for analyzing symbiotic *Vibrio fischeri* reveal patterns of infection and  
581 lux expression in situ. *Appl. Environ. Microbiol.* **72**, 802-810 (2006).
- 582 26. Sammarco, P. W. Polyp bail-out: an escape response to environmental stress and  
583 a new means of reproduction in corals. *Marine ecology progress series.Oldendorf* **10**,  
584 57-65 (1982).
- 585 27. Work, T. M. & Aeby, G. S. Pathology of tissue loss (white syndrome) in *Acropora*  
586 sp. corals from the Central Pacific. *J. Invertebr. Pathol.* **107**, 127-131 (2011).

- 587 28. Work, T. M. & Aeby, G. S. Systematically describing gross lesions in corals. *Dis.*  
588 *Aquat. Org.* **70**, 155-160 (2006).
- 589 29. Ainsworth, T., Fine, M., Roff, G. & Hoegh-Guldberg, O. Bacteria are not the primary  
590 cause of bleaching in the Mediterranean coral *Oculina patagonica*. *The ISME journal*  
591 **2**, 67 (2008).
- 592 30. Ainsworth, T. D., Fine, M., Blackall, L. L. & Hoegh-Guldberg, O. Fluorescence in situ  
593 hybridization and spectral imaging of coral-associated bacterial communities. *Appl.*  
594 *Environ. Microbiol.* **72**, 3016-3020 (2006).
- 595 31. Boyett, H. V., Bourne, D. G. & Willis, B. L. Elevated temperature and light enhance  
596 progression and spread of black band disease on staghorn corals of the Great Barrier  
597 Reef. *Mar. Biol.* **151**, 1711-1720 (2007).
- 598 32. Gignoux-Wolfsohn, S., Marks, C. J. & Vollmer, S. V. White Band Disease  
599 transmission in the threatened coral, *Acropora cervicornis*. *Scientific reports* **2**, 804  
600 (2012).
- 601 33. Kaczmarczyk, L. T. Coral disease dynamics in the central Philippines. *Dis. Aquat.*  
602 *Org.* **69**, 9-21 (2006).
- 603 34. Horridge, G. A. The co-ordination of the protective retraction of coral polyps.  
604 *Philosophical Transactions of the Royal Society of London B: Biological Sciences* **240**,  
605 495-528 (1957).
- 606 35. Levy, O., Dubinsky, Z., Achituv, Y. & Erez, J. Diurnal polyp expansion behavior in  
607 stony corals may enhance carbon availability for symbionts photosynthesis. *J. Exp.*  
608 *Mar. Biol. Ecol.* **333** (2006).
- 609 36. Gladfelter, E. Circulation of fluids in the gastrovascular system of the reef coral  
610 *Acropora cervicornis*. (1983).
- 611 37. Patterson, M. R. A chemical engineering view of cnidarian symbioses. *Am. Zool.* **32**,  
612 566-582 (1992).
- 613 38. Lewis, J. & Price, W. Feeding mechanisms and feeding strategies of Atlantic reef  
614 corals. *J. Zool.* **176**, 527-544 (1975).
- 615 39. Brown, B. E. & Bythell, J. C. Perspectives on mucus secretion in reef corals. *Marine*  
616 *Ecology Progress Series* **296**, 291-309 (2005).
- 617 40. Zetsche, E., Baussant, T., Meysman, F. J. & van Oevelen, D. Direct visualization of  
618 mucus production by the cold-water coral *Lophelia pertusa* with digital holographic  
619 microscopy. *PloS one* **11**, e0146766 (2016).



- 620 41. Lam, E., Kato, N. & Lawton, M. Programmed cell death, mitochondria and the plant  
621 hypersensitive response. *Nature* **411**, 848-853 (2001).
- 622 42. Kvitt, H. *et al.* Breakdown of coral colonial form under reduced pH conditions is  
623 initiated in polyps and mediated through apoptosis. *Proc. Natl. Acad. Sci. U. S. A.* **112**,  
624 2082-2086 (2015).
- 625 43. Garren, M. *et al.* A bacterial pathogen uses dimethylsulfoniopropionate as a cue to  
626 target heat-stressed corals. *The ISME journal* **8**, 999-1007 (2014).
- 627 44. Garren, M. & Azam, F. Corals shed bacteria as a potential mechanism of resilience  
628 to organic matter enrichment. *ISME J.* **6**, 1159-1165 (2012).
- 629 45. Banin, E., Israely, T., Fine, M., Loya, Y. & Rosenberg, E. Role of endosymbiotic  
630 zooxanthellae and coral mucus in the adhesion of the coral-bleaching pathogen *Vibrio*  
631 *shiloi* to its host. *FEMS Microbiol. Lett.* **199**, 33-37 (2001).
- 632 46. Meron, D. *et al.* Role of flagella in virulence of the coral pathogen *Vibrio*  
633 *coralliilyticus*. *Appl. Environ. Microbiol.* **75**, 5704-5707 (2009).
- 634 47. Ushijima, B. *et al.* *Vibrio coralliilyticus* strain OCN008 is an etiological agent of  
635 acute Montipora white syndrome. *Appl. Environ. Microbiol.* **80**, 2102-2109 (2014).
- 636 48. Butler, S. M. & Camilli, A. Going against the grain: chemotaxis and infection in  
637 *Vibrio cholerae*. *Nature reviews Microbiology* **3**, 611 (2005).
- 638 49. O'Toole, R., Milton, D. L. & Wolf-Watz, H. Chemotactic motility is required for  
639 invasion of the host by the fish pathogen *Vibrio anguillarum*. *Mol. Microbiol.* **19**, 625-  
640 637 (1996).
- 641 50. Stocker, R. The 100  $\mu\text{m}$  length scale in the microbial ocean. *Aquat. Microb. Ecol.*  
642 **76**, 189-194 (2015).
- 643 51. Shapiro, O. H. *et al.* Vortical ciliary flows actively enhance mass transport in reef  
644 corals. *Proceedings of the National Academy of Sciences* **111**, 13391-13396 (2014).
- 645 52. Katz, S. M., Pollock, F. J., Bourne, D. G. & Willis, B. L. Crown-of-thorns starfish  
646 predation and physical injuries promote brown band disease on corals. *Coral Reefs*  
647 **33**, 705-716 (2014).
- 648 53. Nugues, M. M. & Bak, R. P. Differential competitive abilities between Caribbean  
649 coral species and a brown alga: a year of experiments and a long-term perspective.  
650 *Mar. Ecol. Prog. Ser.* **315**, 75-86 (2006).
- 651 54. Kramarsky-Winter, E. *et al.* The possible role of cyanobacterial filaments in coral  
652 black band disease pathology. *Microb. Ecol.* **67**, 177-185 (2014).

- 653 55. Agostini, S. *et al.* Biological and chemical characteristics of the coral gastric cavity.  
654 *Coral Reefs* **31**, 147-156 (2012).
- 655 56. Houlbrèque, F., Rodolfo-Metalpa, R. & Ferrier-Pagès, C. Heterotrophic Nutrition of  
656 Tropical, Temperate and Deep-Sea Corals. *Diseases of Coral*, 150-163 (2015).
- 657 57. Sorokin, Y. I. Trophical role of bacteria in the ecosystem of the coral reef. *Nature*  
658 **242**, 415-417 (1973).
- 659 58. Krediet, C. J., Ritchie, K. B., Paul, V. J. & Teplitski, M. Coral-associated micro-  
660 organisms and their roles in promoting coral health and thwarting diseases. *Proc.*  
661 *Biol. Sci.* **280**, 20122328 (2013).
- 662 59. Sato, Y., Civiello, M., Bell, S. C., Willis, B. L. & Bourne, D. G. Integrated approach to  
663 understanding the onset and pathogenesis of black band disease in corals. *Environ.*  
664 *Microbiol.* **18**, 752-765 (2016).
- 665 60. Rosenberg, E., Sharon, G. & Zilber-Rosenberg, I. The hologenome theory of  
666 evolution contains Lamarckian aspects within a Darwinian framework. *Environ.*  
667 *Microbiol.* **11**, 2959-2962 (2009).
- 668 61. Barshis, D. J. *et al.* Genomic basis for coral resilience to climate change. *Proc. Natl.*  
669 *Acad. Sci. U. S. A.* **110**, 1387-1392 (2013).
- 670 62. Palumbi, S. R., Barshis, D. J., Traylor-Knowles, N. & Bay, R. A. Mechanisms of reef  
671 coral resistance to future climate change. *Science* **344**, 895-898 (2014).
- 672 63. Wilson, B. *et al.* An improved detection and quantification method for the coral  
673 pathogen *Vibrio coralliilyticus*. *PloS one* **8**, e81800 (2013).
- 674 64. Certner, R. H., Dwyer, A. M., Patterson, M. R. & Vollmer, S. V. Zooplankton as a  
675 potential vector for white band disease transmission in the endangered coral,  
676 *Acropora cervicornis*. *PeerJ* **5**, e3502 (2017).
